# Supplementary material
Source: PubMed Central journal article supplement (PMC9385735)
Supplement: 41598_2022_18279_MOESM1_ESM.pdf [file 41598_2022_18279_MOESM1_ESM.pdf]

## Supplementary material

### Infections with the SARS-CoV-2 Delta variant exhibit 4-fold increased viral loads in the upper airways compared to Alpha or non-Variants of Concern

Christian J.H. von Wintersdorff<sup>1\*</sup>, Jozef Dingemans<sup>1\*</sup>, Lieke B. van Alphen<sup>1</sup>, Petra F.G. Wolffs<sup>1</sup>, Brian M.J.W. van der Veer<sup>1</sup>, Christian J.P.A. Hoebe<sup>2</sup>, Paul H.M. Savelkoul<sup>1</sup>

**A**

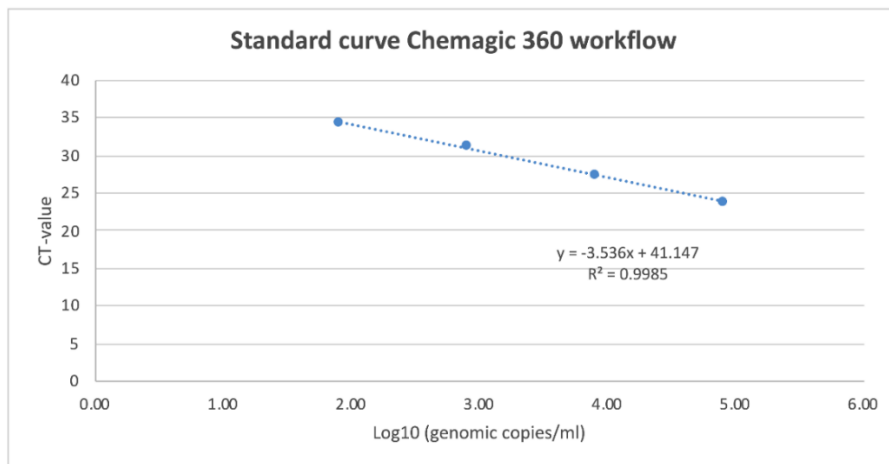

**B**

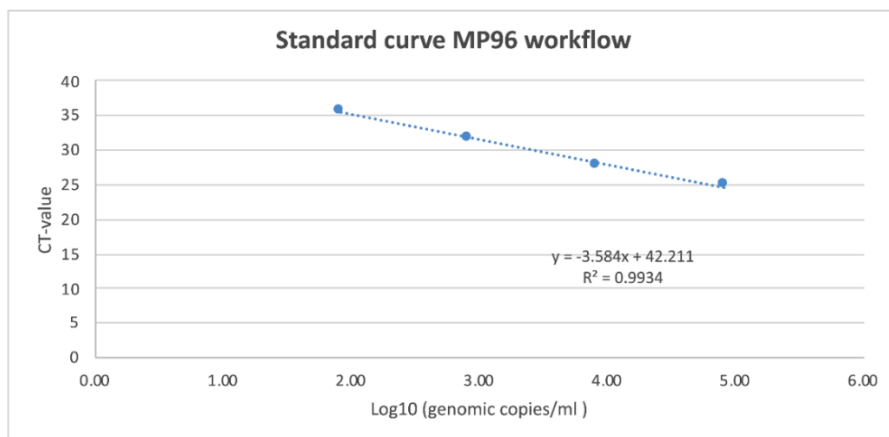

**Figure S1. A.** Standard curve of the CT value in function of log<sub>10</sub> genomic copies/ml for RNA extraction using the Chemagic 360 (Perkin-Elmer). **B.** Standard curve of the CT value in function of log<sub>10</sub> genomic copies/ml for RNA extraction using the MagnaPure 96 (Roche). The standard curve was based on 4 measurements per sample with a known viral load that was tested. The equation for the Chemagic 360 workflow was used to convert CT values to viral loads as the majority of samples were tested using this workflow.

**A**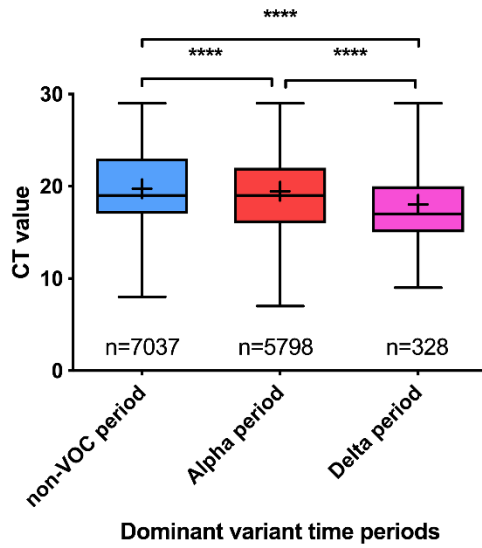**B**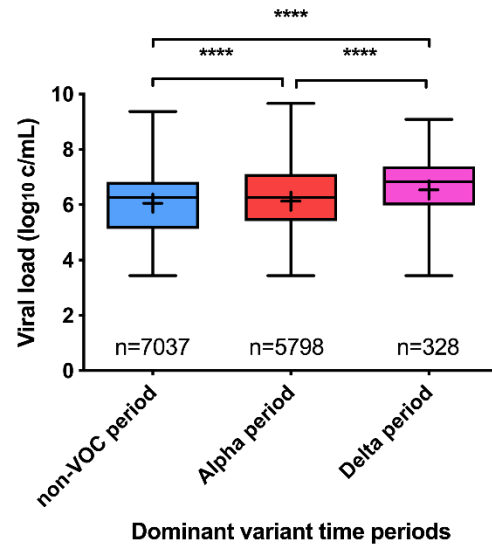

**Figure S2.** CT values (A) and viral loads (B) per time period dominated by non-VOC (Dec 2020 – Feb 2020), Alpha (Mar 2020 – Jun 2020) and Delta (Jul 2020) SARS-CoV-2 variants for samples <CT30. Ns: not significant, \*\*\*\*:  $p < 0.0001$ .

| Age   | Vaccination started | Vaccination completed |
|-------|---------------------|-----------------------|
| <15   | 7%                  | 0%                    |
| 15-19 | 52%                 | 15%                   |
| 20-24 | 50%                 | 24%                   |
| 25-29 | 52%                 | 35%                   |
| 30-34 | 58%                 | 43%                   |
| 35-39 | 65%                 | 52%                   |
| 40-44 | 70%                 | 59%                   |
| 45-49 | 69%                 | 58%                   |
| 50-54 | 74%                 | 64%                   |
| 55-59 | 81%                 | 69%                   |
| 60-64 | 94%                 | 80%                   |
| 65-69 | 88%                 | 74%                   |
| 70-74 | 89%                 | 69%                   |
| 75-79 | 91%                 | 72%                   |
| 80+   | 85%                 | 67%                   |
| Total | 66%                 | 50%                   |

**Figure S3.** SARS-CoV-2 vaccination status per age category of South Limburg, The Netherlands on August 9 of 2021

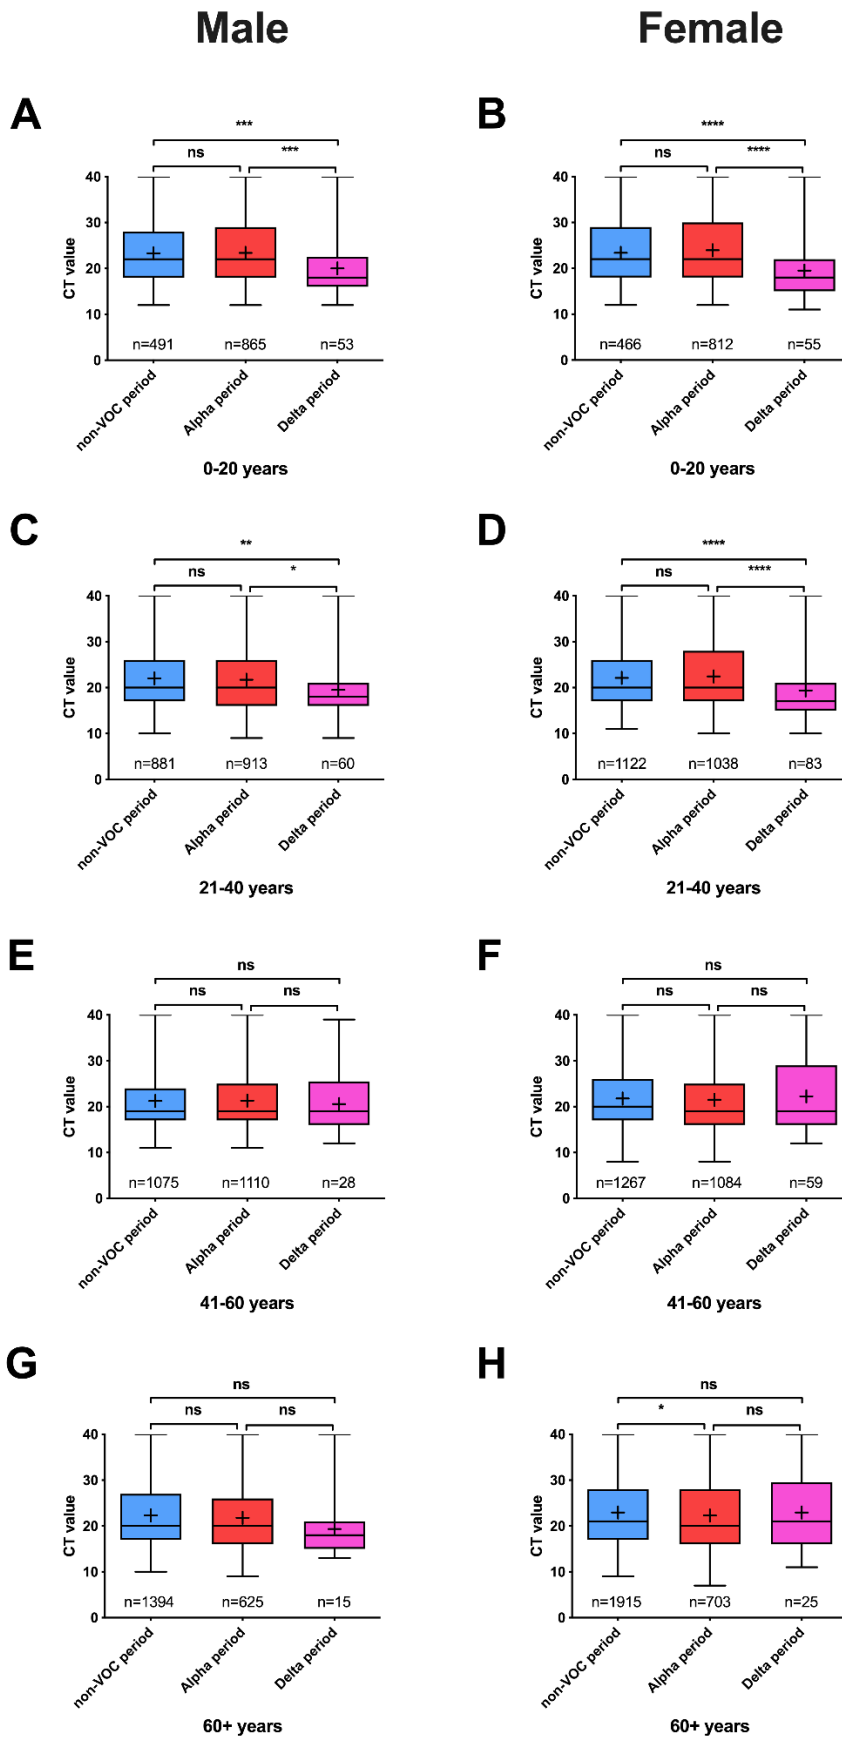

**Figure S4.** CT values stratified by sex for age groups 0-20 (A-B), 21-40 (C-D), 41-60 (E-F) and 60+ years (G-H). Ns: not significant, \*:  $p < 0.05$ , \*\*:  $p < 0.01$ , \*\*\*:  $P < 0.001$ , \*\*\*\*:  $p < 0.0001$ .

**Table S1.** Population characteristics of total vs WGS dataset

|                                            | <b>Total (n=16,185)</b> | <b>WGS-confirmed (n=1,958)</b> |
|--------------------------------------------|-------------------------|--------------------------------|
| <b>South Limburg Public Health Service</b> | 13,927 (86%)            | 1,773 (90.6%)                  |
| <b>Nursing homes</b>                       | 1,932 (12%)             | 134 (6.8%)                     |
| <b>General practitioners</b>               | 226 (1.4%)              | 46 (2.3%)                      |
| <b>Commercial parties</b>                  | 100 (0.6%)              | 5 (0.3%)                       |
| <b>Median Age (years)</b>                  | 47                      | 46                             |
| <b>Male</b>                                | 7,510 (46%)             | 912 (47%)                      |
| <b>Female</b>                              | 8,629 (53%)             | 1,035 (53%)                    |

**Table S2.** Mean and median age per age group.

|                              | N    | Mean age (years) |
|------------------------------|------|------------------|
| <b>Age group 0-20 years</b>  |      |                  |
| Non-VOC period               | 960  | 14.32            |
| Alpha period                 | 1694 | 12.63            |
| Delta period                 | 108  | 14.52            |
| <b>Age group 21-40 years</b> |      |                  |
| Non-VOC period               | 2010 | 29.97            |
| Alpha period                 | 1955 | 30.21            |
| Delta period                 | 143  | 27.64            |
| <b>Age group 41-60 years</b> |      |                  |
| Non-VOC period               | 2346 | 51.40            |
| Alpha period                 | 2197 | 50.77            |
| Delta period                 | 87   | 49.67            |
| <b>Age group 61+ years</b>   |      |                  |
| Non-VOC period               | 3314 | 77.00            |
| Alpha period                 | 1331 | 72.70            |
| Delta period                 | 40   | 79.93            |

**Table S3.** Comparison of CT values and viral loads for non-VOC, Alpha and Delta variants of SARS-CoV-2 between males and females.

| Male                  |          |        |       |             |                              |      |           | Female                |          |        |       |             |                              |      |           |
|-----------------------|----------|--------|-------|-------------|------------------------------|------|-----------|-----------------------|----------|--------|-------|-------------|------------------------------|------|-----------|
|                       | CT value |        |       |             | Viral Load (log10 copies/mL) |      |           |                       | CT value |        |       |             | Viral Load (log10 copies/mL) |      |           |
|                       | N        | Median | Mean  | 95% CI      | Median                       | Mean | 95% CI    |                       | N        | Median | Mean  | 95% CI      | Median                       | Mean | 95% CI    |
| Total data set        |          |        |       |             |                              |      |           | Total data set        |          |        |       |             |                              |      |           |
| Non-VOC period        | 3840     | 20     | 22.09 | 21.88-22.29 | 5.98                         | 5.44 | 5.38-5.49 | Non-VOC period        | 4770     | 21     | 22.49 | 22.30-22.69 | 5.70                         | 5.33 | 5.28-5.38 |
| Alpha period          | 3513     | 20     | 22.01 | 21.78-22.23 | 5.98                         | 5.47 | 5.41-5.53 | Alpha period          | 3637     | 20     | 22.47 | 22.24-22.71 | 5.98                         | 5.36 | 5.30-5.42 |
| Delta period          | 156      | 18     | 19.85 | 18.81-20.88 | 6.55                         | 6.10 | 5.83-6.36 | Delta period          | 222      | 18     | 20.59 | 19.63-21.54 | 6.55                         | 5.89 | 5.65-6.14 |
| Age group 0-20 years  |          |        |       |             |                              |      |           | Age group 0-20 years  |          |        |       |             |                              |      |           |
| Non-VOC period        | 491      | 22     | 23.31 | 22.72-23.89 | 5.41                         | 5.10 | 4.95-5.26 | Non-VOC period        | 466      | 22     | 23.38 | 22.78-23.97 | 5.41                         | 5.06 | 4.90-5.23 |
| Alpha period          | 865      | 22     | 23.37 | 22.90-23.84 | 5.41                         | 5.10 | 4.98-5.23 | Alpha period          | 812      | 22     | 23.94 | 23.44-24.43 | 5.41                         | 4.96 | 4.83-5.09 |
| Delta period          | 53       | 18     | 20.00 | 18.09-21.91 | 6.55                         | 6.07 | 5.59-6.55 | Delta period          | 55       | 18     | 19.51 | 17.90-21.12 | 6.55                         | 6.15 | 5.73-6.58 |
| Age group 21-40 years |          |        |       |             |                              |      |           | Age group 21-40 years |          |        |       |             |                              |      |           |
| Non-VOC period        | 881      | 20     | 22.02 | 21.59-22.46 | 5.98                         | 5.46 | 5.34-5.57 | Non-VOC period        | 1122     | 20     | 22.13 | 21.75-22.51 | 5.98                         | 5.43 | 5.33-5.53 |
| Alpha period          | 913      | 20     | 21.71 | 21.27-22.14 | 5.98                         | 5.54 | 5.43-5.66 | Alpha period          | 1038     | 20     | 22.46 | 22.02-22.90 | 5.98                         | 5.36 | 5.25-5.48 |
| Delta period          | 60       | 18     | 19.50 | 17.92-21.08 | 6.55                         | 6.18 | 5.78-6.58 | Delta period          | 83       | 17     | 19.40 | 17.90-20.90 | 6.83                         | 6.20 | 5.80-6.60 |
| Age group 41-60 years |          |        |       |             |                              |      |           | Age group 41-60 years |          |        |       |             |                              |      |           |
| Non-VOC period        | 1075     | 19     | 21.26 | 20.88-21.63 | 6.26                         | 5.66 | 5.56-5.76 | Non-VOC period        | 1267     | 20     | 21.79 | 21.43-22.14 | 5.98                         | 5.52 | 5.42-5.61 |
| Alpha period          | 1120     | 19     | 21.32 | 20.94-21.70 | 6.26                         | 5.66 | 5.55-5.76 | Alpha period          | 1084     | 19     | 21.51 | 21.10-21.92 | 6.26                         | 5.61 | 5.51-5.72 |
| Delta period          | 28       | 19     | 20.57 | 17.88-23.27 | 6.26                         | 5.87 | 5.15-6.58 | Delta period          | 59       | 19     | 22.25 | 20.17-24.34 | 6.26                         | 5.48 | 4.95-6.00 |
| Age group 61+ years   |          |        |       |             |                              |      |           | Age group 61+ years   |          |        |       |             |                              |      |           |
| Non-VOC period        | 1394     | 20     | 22.33 | 21.97-22.68 | 5.98                         | 5.37 | 5.28-5.47 | Non-VOC period        | 1915     | 21     | 22.96 | 22.64-23.29 | 5.70                         | 5.22 | 5.13-5.30 |
| Alpha period          | 625      | 20     | 21.80 | 21.25-22.34 | 5.98                         | 5.53 | 5.39-5.68 | Alpha period          | 703      | 20     | 22.28 | 21.73-22.83 | 5.98                         | 5.41 | 5.27-5.55 |
| Delta period          | 15       | 18     | 19.33 | 15.67-23.00 | 6.55                         | 6.28 | 5.44-7.12 | Delta period          | 25       | 21     | 22.96 | 19.58-26.34 | 5.70                         | 5.28 | 4.43-6.13 |
